# Supplementary material for: Abnormalities in gray matter volume in patients with borderline personality disorder and their relation to lifetime depression: A VBM study
Source: PLoS One. 2018 Feb 21;13(2):e0191946. doi: 10.1371/journal.pone.0191946 (PMC5842882; doi:10.1371/journal.pone.0191946)
Supplement: S4 Table — As seen in article, there was a significant negative correlation between the BSL-23 score and mean volume in the combined lateral frontal ROI (r = -0.32; p = 0.02). This remained significant after controlling for age (r = -0.41, p = 0.002) but became insignificant after controlling for IQ (r = -0.16, p = 0.25). The correlation between BSL-23 score and the medial frontal ROI was not significant. There were no significant correlations between DIB-R total score and mean volumes in either the medial frontal ROI (r = 0.14; p = 0.23) or the combined left and right lateral frontal ROIs (r = -0.06; p = 0.63). (XLSX) [file pone.0191946.s004.xlsx]

## Sheet: Hoja1
	S4 Table. Relationship of changes found in the whole brain analysis to clinical features: BSL-23 and DIB-R scores
Subject	Medial_ROI	Lateral_ROI	BSL-23
BPD1	0.5126	0.4046	85
BPD2	0.5086	0.468	84
BPD3	0.479	0.4676	71
BPD4	0.5302	0.4412	69
BPD5	0.574	0.4043	34
BPD6	0.464	0.4775	23
BPD7	0.5299	0.4107	30
BPD8	0.4554	0.431	46
BPD9	0.5107	0.5406	2
BPD10	0.5671	0.5109	19
BPD11	0.509	0.4795	56
BPD12	0.4612	0.4737	83
BPD13	0.4367	0.4012	31
BPD14	0.5786	0.441	82
BPD15	0.3956	0.385	21
BPD16	0.4977	0.3334	80
BPD17	0.5562	0.4352	85
BPD18	0.4929	0.4199	56
BPD19	0.5125	0.407	81
BPD20	0.4119	0.3353	78
BPD21	0.4499	0.4083	83
BPD22	0.4579	0.4995	25
BPD23	0.555	0.4777	35
BPD24	0.5079	0.3847	23
BPD25	0.5348	0.4162	65
BPD26	0.4958	0.4692	27
BPD27	0.5547	0.3495	71
BPD28	0.5166	0.4065	64
BPD29	0.4504	0.3997	39
BPD30	0.5053	0.4268	84
BPD31	0.4304	0.4315	63
BPD32	0.4757	0.3195	82
BPD33	0.455	0.3543	84
BPD34	0.4607	0.5056	55
BPD35	0.3913	0.3338	103
BPD36	0.4932	0.4164	27
BPD37	0.447	0.4629	105
BPD38	0.4482	0.4432	35
BPD39	0.5499	0.4673	54
BPD40	0.4671	0.3723	40
BPD41	0.5155	0.4292	16
BPD42	0.5157	0.3823	57
BPD43	0.4584	0.434	70
BPD44	0.4455	0.3968	44
BPD45	0.4393	0.4222	18
BPD46	0.3918	0.393	50
BPD47	0.4401	0.422	89
BPD48	0.5983	0.4897	43
BPD49	0.4879	0.5242	61
BPD50	0.3854	0.3755	37
BPD51	0.4287	0.4174	46
BPD52	0.4689	0.4182	63
BPD53	0.6114	0.527	38
BPD54	0.3539	0.4085	84
	Pearson correlation	Pearson correlation
	-0.12	-0.32
	p-value	p-value
	0.38	0.02
Subject	Medial_ROI	Lateral_ROI	Total_ DIBR
BPD1	0.513	0.405	9
BPD2	0.509	0.468	9
BPD3	0.479	0.468	9
BPD4	0.53	0.441	9
BPD5	0.574	0.404	8
BPD6	0.464	0.478	6
BPD7	0.53	0.411	9
BPD8	0.523	0.432	7
BPD9	0.455	0.431	8
BPD10	0.567	0.511	7
BPD11	0.407	0.327	7
BPD12	0.467	0.39	10
BPD13	0.461	0.474	8
BPD14	0.437	0.401	6
BPD15	0.579	0.441	10
BPD16	0.396	0.385	8
BPD17	0.457	0.494	9
BPD18	0.449	0.458	6
BPD19	0.498	0.333	9
BPD20	0.556	0.435	7
BPD21	0.493	0.42	9
BPD22	0.513	0.407	7
BPD23	0.412	0.335	8
BPD24	0.45	0.408	8
BPD25	0.458	0.5	9
BPD26	0.555	0.478	8
BPD27	0.508	0.385	9
BPD28	0.535	0.416	7
BPD29	0.496	0.469	8
BPD30	0.555	0.35	9
BPD31	0.517	0.407	8
BPD32	0.45	0.4	7
BPD33	0.505	0.427	9
BPD34	0.43	0.432	8
BPD35	0.476	0.32	8
BPD36	0.455	0.354	9
BPD37	0.461	0.506	7
BPD38	0.391	0.334	10
BPD39	0.493	0.416	6
BPD40	0.447	0.463	9
BPD41	0.448	0.443	9
BPD42	0.55	0.467	8
BPD43	0.467	0.372	7
BPD44	0.516	0.429	7
BPD45	0.516	0.382	7
BPD46	0.458	0.434	9
BPD47	0.446	0.397	7
BPD48	0.439	0.422	6
BPD49	0.392	0.393	7
BPD50	0.44	0.422	6
BPD51	0.598	0.49	8
BPD52	0.488	0.524	9
BPD53	0.399	0.446	7
BPD54	0.388	0.356	9
BPD55	0.496	0.403	9
BPD56	0.385	0.376	6
BPD57	0.429	0.417	9
BPD58	0.469	0.418	7
BPD59	0.589	0.431	7
BPD60	0.436	0.397	7
BPD61	0.611	0.527	7
BPD62	0.354	0.409	7
BPD63	0.449	0.408	7
BPD64	0.451	0.432	7
BPD65	0.437	0.412	6
BPD66	0.506	0.467	6
BPD67	0.464	0.376	9
BPD68	0.45	0.453	10
BPD69	0.354	0.409	6
	Pearson correlation	Pearson correlation
	0.14	-0.06
	p-value	p-value
	0.23	0.63
