# Supplementary material for: Abnormalities in gray matter volume in patients with borderline personality disorder and their relation to lifetime depression: A VBM study
Source: PLoS One. 2018 Feb 21;13(2):e0191946. doi: 10.1371/journal.pone.0191946 (PMC5842882; doi:10.1371/journal.pone.0191946)
Supplement: S5 Table — As seen in article, 31,15% of patients had no comorbid personality disorder. We summarize all data for each patient. (SCID II data were missing for 6 patients). (XLSX) [file pone.0191946.s005.xlsx]

## Sheet: Hoja1
	S5 Table. Commorbid personality disorders in the sample of Borderline Personality Disorder patients
	(numbers are scores in each SCID-II personality disorder)
subject	SCIDII_Borderline	SCIDII-Others	SCIDII_1_Avoidant	SCIDII_2_Dependant	SCIDII_3_ObsessiveCompulsive	SCIDII_4_PassiveAgressive	SCIDII_5_Depressive	SCIDII_6_Paranoid	SCIDII_7_Schizotipic	SCIDII_8_Schizoid	SCIDII_8_Histrionic	SCIDII_10_Narcisistic	SCIDII_12_Antisocial	SCIDII_13_NotSpecified
BPD1	1	2	1	0	0	0	1	0	0	0	0	0	0	0
BPD2	1	0	0	0	0	0	0	0	0	0	0	0	0	0
BPD3
BPD4	1	4	0	1	1	1	1	0	0	0	0	0	0	0
BPD5	1	1	0	0	0	0	1	0	0	0	0	0	0	0
BPD6	1	0	0	0	0	0	0	0	0	0	0	0	0	0
BPD7	0	0	0	0	0	0	0	0	0	0	0	0	0	0
BPD8	1	3	0	1	1	1	0	0	0	0	0	0	0	0
BPD9	1	2	0	0	1	0	0	1	0	0	0	0	0	0
BPD10	1	1	0	0	0	0	1	0	0	0	0	0	0	0
BPD11	1	0	0	0	0	0	0	0	0	0	0	0	0	0
BPD12	1	0	0	0	0	0	0	0	0	0	0	0	0	0
BPD13	1	1	0	0	0	0	0	1	0	0	0	0	0	0
BPD14	1	2	0	0	0	0	1	1	0	0	0	0	0	0
BPD15	1	2	0	1	0	0	1	0	0	0	0	0	0	0
BPD16	1	1	0	0	1	0	0	0	0	0	0	0	0	0
BPD17	1	4	1	0	1	1	1	0	0	0	0	0	0	0
BPD18	1	0	0	0	0	0	0	0	0	0	0	0	0	0
BPD19	1	3	1	1	1	0	0	0	0	0	0	0	0	0
BPD20	1	2	0	0	0	0	0	1	0	0	1	0	0	0
BPD21	1	3	0	0	1	0	0	1	0	0	0	1	0	0
BPD22
BPD23
BPD24					0
BPD25
BPD26	1	3	1	1	0	1	0	0	0	0	0	0	0	0
BPD27	1	1	0	0	0	0	1	0	0	0	0	0	0	0
BPD28	1	1	0	0	0	0	1	0	0	0	0	0	0	0
BPD29	1	2	1	0	0	0	1	0	0	0	0	0	0	0
BPD30	1	2		0	0	0	1	0	0	0	0	0	0	0
BPD31	1	1	0	0	0	0	1	0	0	0	0	0	0	0
BPD32	1	1		1	0	0	0	0	0	0	0	0	0	0
BPD33	1	1	0	0	0	0	0	0	0	0	0	0	1	0
BPD34	1	0		0	0	0	0	0	0	0	0	0	0	0
BPD35	1	1	0	1	0	0	0	0	0	0	0	0	0	0
BPD36	1	2	0	0	0	0	1	0	0	0	0	0	1	0
BPD37	1	1	0	1	0	0	0	0	0	0	0	0	0	0
BPD38	1	3	0	0	0	1	0	1	0	0	0	0	1	0
BPD39	1	1	0	0	0	0	0	0	0	0	0	0	1	0
BPD40	1	2	0	1	0	0	0	0	0	0	0	0	1	0
BPD41	1	1	0	0	0	0	0	0	0	0	1	0	0	0
BPD42	1	0	0	0	0	0	0	0	0	0	0	0	0	0
BPD43	1	2	0	0	0	0	1	1	0	0	0	0	0	0
BPD44	1	0	0	0	0	0	0	0	0	0	0	0	0	0
BPD45	1	3	0	0	0	0	0	1	1	0	0	0	1	0
BPD46	1	1	0	0	0	1	0	0	0	0	0	0	0	0
BPD47	1	2	1	0	1	0	0	0	0	0	0	0	0	0
BPD48	1	0	0	0	0	0	0	0	0	0	0	0	0	0
BPD49	1	1	0	1	0	0	0	0	0	0	0	0	0	0
BPD50	1	2	1	1	0	0	0	0	0	0	0	0	0	0
BPD51	1	0	0	0	0	0	0	0	0	0	0	0	0	0
BPD52	1	0	0	0	0	0	0	0	0	0	0	0	0	0
BPD53	1	1	0	0	0	1	0	0	0	0	0	0	0	0
BPD54	1	1	0	0	0	0	0	0	0	0	0	0	1	0
BPD55	1	0	0	0	0	0	0	0	0	0	0	0	0	0
BPD56	1	0	0	0	0	0	0	0	0	0	0	0	0	0
BPD57	1	0	0	0	0	0	0	0	0	0	0	0	0	0
BPD58	1	1	0	0	0	0	0	1	0	0	0	0	0	0
BPD59	1	1	0	0	0	0	0	1	0	0	0	0	0	0
BPD60	1	0	0	0	0	0	0	0	0	0	0	0	0	0
BPD61	1	1	0	0	0	1	0	0	0	0	0	0	0	0
BPD62	1	3	1	0	1	0	0	0	1	0	0	0	0	0
BPD63	1	0	0	0	0	0	0	0	0	0	0	0	0	0
BPD64	1	1	0	1	0	0	0	0	0	0	0	0	0	0
BPD65	1	0	0	0	0	0	0	0	0	0	0	0	0	0
BPD66	1	0	0	0	0	0	0	0	0	0	0	0	0	0
BPD67	1	2	0	1	0	0	1	0	0	0	0	0	0	0
BPD68	1	1	0	0	0	1	0	0	0	0	0	0	0	0
BPD69	1	2	0	1	0	0	1	0	0	0	0	0	0	0
BPD70	1	1	0	1	0	0	0	0	0	0	0	0	0	0
BPD71	1	0	0	0	0	0	0	0	0	0	0	0	0	0
BPD72	1	0	0	0	0	0	0	0	0	0	0	0	0	0
BPD73	1	0	0	0	0	0	0	0	0	0	0	0	0	0
BPD74	1	3	0	0	0	1	1	1	0	0	0	0	0	0
BPD75	1	0	0	0	0	0	0	0	0	0	0	0	0	0
BPD76	1	0	0	0	0	0	0	0	0	0	0	0	0	0
