# Supplementary material for: Abnormalities in gray matter volume in patients with borderline personality disorder and their relation to lifetime depression: A VBM study
Source: PLoS One. 2018 Feb 21;13(2):e0191946. doi: 10.1371/journal.pone.0191946 (PMC5842882; doi:10.1371/journal.pone.0191946)
Supplement: S6 Table — (XLSX) [file pone.0191946.s006.xlsx]

## Sheet: patients
	S6 Table. Individual data of Grey Matter volume of hippocampus, amigdala and ROIs in patients with and without antipsychotics
Patients without antispychotic treatment
subject	left hippocampus	right hippocampus	left amygdala	right amygdala	Medial ROI	Lateral ROI
bpd1	0.604	0.553	0.531	0.498	0.5126	0.4046
bpd2	0.53	0.52	0.504	0.487	0.5086	0.468
bpd3	0.536	0.535	0.485	0.483	0.4138	0.3951
bpd4	0.581	0.566	0.516	0.505	0.479	0.4676
bpd5	0.561	0.57	0.523	0.534	0.5302	0.4412
bpd6	0.521	0.513	0.486	0.485	0.574	0.4043
bpd7	0.556	0.505	0.514	0.493	0.464	0.4775
bpd8	0.514	0.508	0.48	0.475	0.5299	0.4107
bpd9	0.564	0.542	0.516	0.533	0.5232	0.4316
bpd10	0.551	0.536	0.527	0.512	0.4554	0.431
bpd11	0.526	0.541	0.526	0.52	0.5107	0.5406
bpd12	0.553	0.56	0.475	0.472	0.5671	0.5109
bpd13	0.624	0.595	0.491	0.468	0.4068	0.3271
bpd14	0.6	0.511	0.506	0.455	0.4068	0.3271
bpd15	0.534	0.482	0.442	0.466	0.4673	0.3901
bpd16	0.568	0.547	0.522	0.548	0.4612	0.4737
bpd17	0.542	0.525	0.513	0.506	0.4367	0.4012
bpd18	0.582	0.565	0.55	0.52	0.5786	0.441
bpd19	0.576	0.565	0.486	0.474	0.3956	0.385
bpd20	0.613	0.562	0.497	0.492	0.4566	0.4944
bpd21	0.535	0.556	0.521	0.547	0.4486	0.4583
bpd22	0.625	0.577	0.532	0.54	0.544	0.4392
bpd23	0.588	0.568	0.517	0.534	0.4709	0.3792
bpd24	0.52	0.544	0.553	0.527	0.4524	0.3939
bpd25	0.598	0.57	0.554	0.536	0.4985	0.4128
bpd26	0.557	0.553	0.504	0.493	0.4977	0.3334
bpd27	0.564	0.539	0.504	0.485	0.5562	0.4352
bpd28	0.522	0.51	0.465	0.451	0.4119	0.3353
bpd29	0.678	0.612	0.584	0.551	0.4499	0.4083
bpd30	0.56	0.54	0.477	0.519	0.4579	0.4995
bpd31	0.56	0.578	0.511	0.514	0.555	0.4777
bpd32	0.553	0.51	0.488	0.439	0.4958	0.4692
bpd33	0.536	0.517	0.477	0.478	0.5547	0.3495
bpd34	0.492	0.452	0.466	0.424	0.5166	0.4065
bpd35	0.611	0.56	0.548	0.535	0.4504	0.3997
bpd36	0.574	0.549	0.528	0.511	0.5053	0.4268
bpd37	0.601	0.614	0.513	0.564	0.4304	0.4315
bpd38	0.564	0.574	0.508	0.539	0.4607	0.5056
bpd39	0.526	0.484	0.469	0.438	0.3913	0.3338
bpd40	0.5	0.502	0.478	0.485	0.4932	0.4164
bpd41	0.541	0.522	0.484	0.502	0.5499	0.4673
bpd42	0.626	0.569	0.602	0.511	0.4671	0.3723
bpd43	0.588	0.564	0.553	0.511	0.5155	0.4292
bpd44	0.552	0.545	0.512	0.51	0.5157	0.3823
bpd45	0.585	0.614	0.56	0.57	0.4584	0.434
bpd46	0.58	0.591	0.54	0.502	0.4455	0.3968
bpd47	0.515	0.504	0.455	0.475	0.4393	0.4222
bpd48	0.573	0.499	0.511	0.494	0.3918	0.393
bpd49	0.604	0.583	0.517	0.511	0.4401	0.422
bpd50	0.563	0.552	0.519	0.507	0.5983	0.4897
bpd51	0.546	0.55	0.494	0.52	0.4879	0.5242
bpd52	0.494	0.499	0.473	0.506	0.3993	0.4463
bpd53	0.582	0.577	0.493	0.498	0.3875	0.3561
bpd54	0.499	0.518	0.454	0.46	0.4961	0.4034
bpd55	0.586	0.592	0.521	0.522	0.4287	0.4174
bpd56	0.552	0.566	0.503	0.506	0.4689	0.4182
bpd57	0.557	0.588	0.527	0.538	0.5887	0.4311
bpd58	0.543	0.507	0.51	0.499	0.4364	0.3974
bpd59	0.575	0.533	0.513	0.51	0.4489	0.4075
bpd60	0.503	0.536	0.492	0.513	0.4509	0.4324
bpd61	0.579	0.518	0.485	0.486	0.4373	0.4124
bpd62	0.541	0.52	0.541	0.553	0.5058	0.4666
bpd63	0.553	0.546	0.509	0.536	0.4498	0.4532
bpd64	0.577	0.568	0.501	0.462	0.3539	0.4085
Patients with antipsychotic treatment
subject	left hippocampus	right hippocampus	left amygdala	right amygdala	Medial ROI	Lateral ROI
bpd1	0.599	0.539	0.518	0.5	0.4929	0.4199
bpd2	0.592	0.595	0.518	0.521	0.5125	0.407
bpd3	0.523	0.497	0.502	0.459	0.5079	0.3847
bpd4	0.58	0.579	0.491	0.475	0.5348	0.4162
bpd5	0.605	0.554	0.531	0.512	0.4757	0.3195
bpd6	0.583	0.553	0.601	0.549	0.455	0.3543
bpd7	0.547	0.542	0.516	0.529	0.447	0.4629
bpd8	0.621	0.596	0.554	0.573	0.4482	0.4432
bpd9	0.555	0.512	0.488	0.485	0.3854	0.3755
bpd10	0.577	0.568	0.501	0.462	0.3539	0.4085
bpd11	0.538	0.547	0.465	0.449	0.464	0.376
